# Supplementary material for: Transcriptome and Allele Specificity Associated with a 3BL Locus for Fusarium Crown Rot Resistance in Bread Wheat
Source: PLoS One. 2014 Nov 18;9(11):e113309. doi: 10.1371/journal.pone.0113309 (PMC4236173; doi:10.1371/journal.pone.0113309)
Supplement: Table S2 — Primers used for real-time qualitative PCR analysis and for the validation of single nucleotide polymorphism detected from the RNA sequence analysis. (XLSX) [file pone.0113309.s005.xlsx]

## Sheet: Table S2 
Supplementary Table S2 Primers used for real-time qualitative PCR analysis and for the validation of single nucleotide polymorphism detected in RNA sequence analysis
Gene name	Forward sequence (5'-3')	Reverse sequence (5'-3')	Annealing temperature (°C)	Triticum urartu coding sequence id*	T. urartu genomic sequence contig No. (start-end)#	Aegilops tauschii coding sequence id*	Ae. tauschii genomic sequence contig No. (start-end)#	Description
Ta#S58856166	ACCTTGTTCAACCAACCGGA	AGGCTCGATTGGCACATGAA	60	-	-	-	-	for RT-qPCR validation
Ta#S58850454	GGCACCTCGTCTTTCGAGAT	ATAGAGACCGCCGGGATGAT	60	-	-	-	-	for RT-qPCR validation
Ta#S13159779	AAAAGTCCCCTGCATCTCCC	GCGCCATTTCTGTTCACCTC	60	-	-	-	-	for RT-qPCR validation
Ta#S58885561	AAAAGTCCCCTGCATCTCCC	GCGCCATTTCTGTTCACCTC	60	-	-	-	-	for RT-qPCR validation
Ta.27922.1.S1_x_at**	CAGGTGCTTGTTTGCCTATG	GCAGCCTCTTTCCTATCGTTCC	60	-	-	-	-	for RT-qPCR validation
Ta#S37789723	TACCTCCCATCATAACTGTC	GTTGTTTTGCCAACCAGGTGAT	63.5	TRIUR3_11720	AOTI011224908.1 (12474bp-13286bp)	AEGTA07892	AOCO010567030.1(2529b-4546bp)	for SNPs re-sequencing validation
Ta#S52545282	TCCCTCGACGACCCGTCGGA	ATACTTGTGATAGAGCCTGT	62	TRIUR3_25701	AOTI011178551.1(1192bp-4432bp)	AEGTA09891	AOCO010689528.1(8607bp-13537bp)	for SNPs re-sequencing validation
Ta#S58887817	ATACCATACATGCCACAGGA	AGGCAACAAACGTTGATGGT (for resistant genotype) AGGCAACAAATGTTGATGGT (for susceptible genotype)	65	-	-	AEGTA30622	AOCO010866692.1(148bp-5148bp)	for SNPs re-sequencing validation
*The coding sequences of T. urartu (TRIUR3_120813_filter150_cds) and Ae. tauschii (wheatD_final_43150.gff.cds) were downloaded from GIGA_DB (http://gigadb.org/).
# The genomes of T. urartu and Ae. tauschii were downloaded from http://www.ncbi.nlm.nih.gov/Traces/wgs/?val=AOTI01 (AOTI01.fsa.1-5) and http://www.ncbi.nlm.nih.gov/Traces/wgs/?val=AOCO01 (AOCO01.fsa.1-), respectively, from NCBI in March of 2013.
** Primers were from Long et al. (2010)
Reference
Long XY, Wang JR, Ouellet T, Rocheleau H, Wei YM, Pu Z, Jiang QT, Lan XJ, Zheng YL (2010) Genome-wide identification and evaluation of novel internal control genes for Q-PCR based tran- script normalization in wheat. Plant Mol Biol 74:307–311
